# Supplementary material for: Genome-wide identification of the B3 transcription factor family in pepper (Capsicum annuum) and expression patterns during fruit ripening
Source: Springer Nature journal article supplement (doi:10.1038/s41598-023-51080-6), 2024-01-26

**Figure S1: Graph of Motif Results**

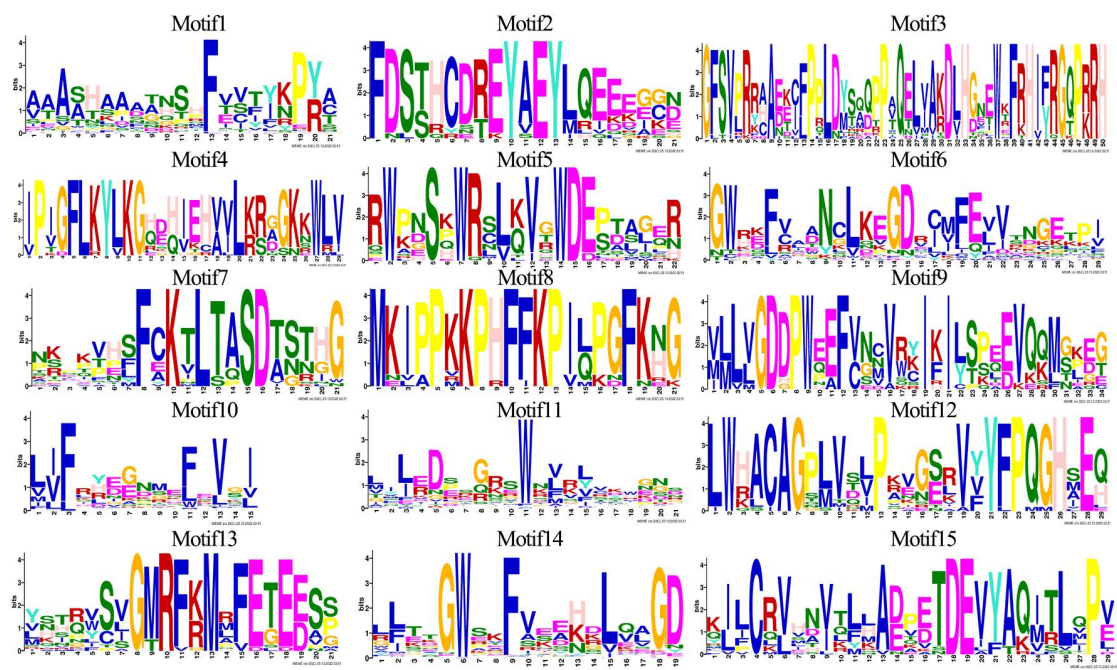

Supplement: MOESM1 [file 41598_2023_51080_MOESM1_ESM.pdf]
